# Supplementary material for: DeepISMNet: Three-Dimensional Implicit Structural Modeling with Convolutional Neural Network
Source: Copernicus journal article supplement (doi:10.5194/gmd-2022-117), 2022-05-05
Supplement: Supplementary file [file gmd-2022-117-AC3-supplement.pdf]

## Responses to comments from reviewers

Dear editors,

We sincerely appreciate all your wonderful work so that we could obtain the reviewed manuscript promptly. Thanks for your time on reviewing and processing our paper and providing your insightful feedback. Below we are trying to responses your suggestions and questions. Let's discuss more if some of our explanations in the responses are not clear to you.

Thanks!

### ● **Code and Data Availability**

- 1) Please publish your code in one of the appropriate repositories. Also, please, remind that you must include in a potential reviewed version of your manuscript the modified 'Code and Data Availability' section, with the DOI of the code.

Thanks for your suggestion. We have modified the related texts in section “Code and Data Availability” of the manuscript. The source code for the CNN developed in Pytorch in this research is available and can be accessed through the following DOI link of Zenodo:

<https://doi.org/10.5281/zenodo.6684269>

The synthetic structural models, used for training and validating the network, are uploaded to Zenodo and are freely available through the DOI link:

<https://doi.org/10.5281/zenodo.6480165>.
